# Supplementary material for: Phenotypic diversification by enhanced genome restructuring after induction of multiple DNA double-strand breaks
Source: PubMed Central journal article supplement (PMC5959919; doi:10.1038/s41467-018-04256-y), 2018-05-18
Supplement: 41467_2018_4256_MOESM1_ESM.pdf [file 41467_2018_4256_MOESM1_ESM.pdf]

## Supplementary Information

Phenotypic diversification by enhanced genome restructuring after induction of multiple DNA double strand breaks

Muramoto et al.

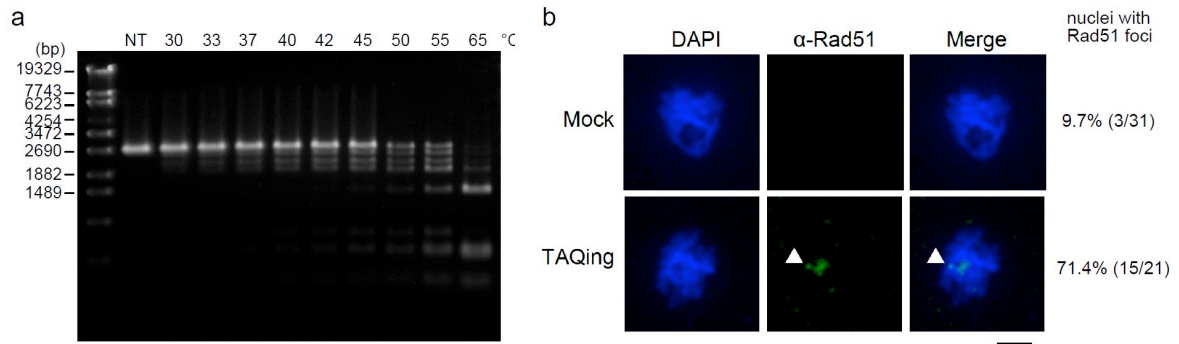

**Supplementary Fig. 1.** Heat-dependent TaqI activation. **(a)** *In vitro* TaqI-activation assay. *Nde*I-linearized pUC19 plasmid DNA (2686-bp, second lane) was incubated with purified TaqI for 30 min at the indicated temperatures. **(b)** Rad51 foci formation in TAQed cells. TaqI expression was induced in wild-type cells expressing pTaqI (indicated as “TAQing”) or vector controls (“Mock”), and foci formation was monitored by immunostaining. Arrowheads indicate Rad51 foci. Foci frequency is shown on the right. Bar, 2  $\mu$ m.

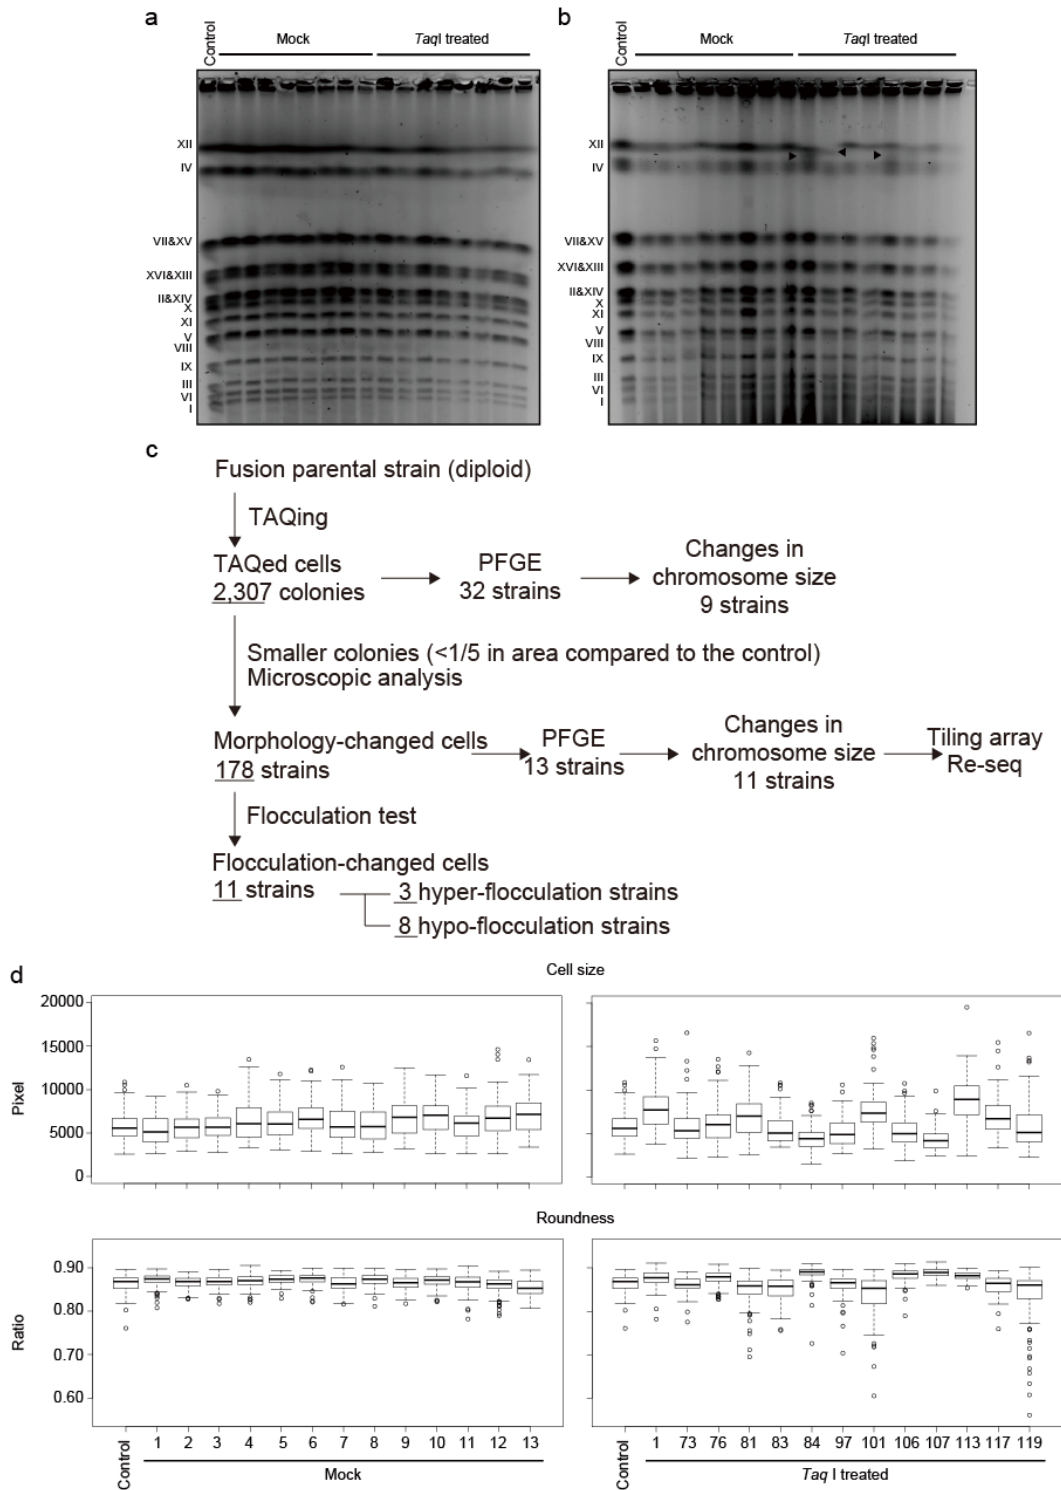

**Supplementary Fig. 2.** TAQed mutant showing various phenotypic changes. **(a, b)** Differences in chromosome size revealed by PFGE in **(a)** mock-treated or TAQed haploid (YPH499) and **(b)** fused diploid (WT14) strains. Arrowheads indicate chromosomal bands exhibiting size changes. **(c)** Workflow of TAQed-mutant selection. **(d)** Variability in cell area (upper) and roundness (lower) after TAQing treatment.  $n = 100$ , the center line is the median, bounds are the 25th and 75th percentiles and whiskers are  $\pm 1.5$  IQR.

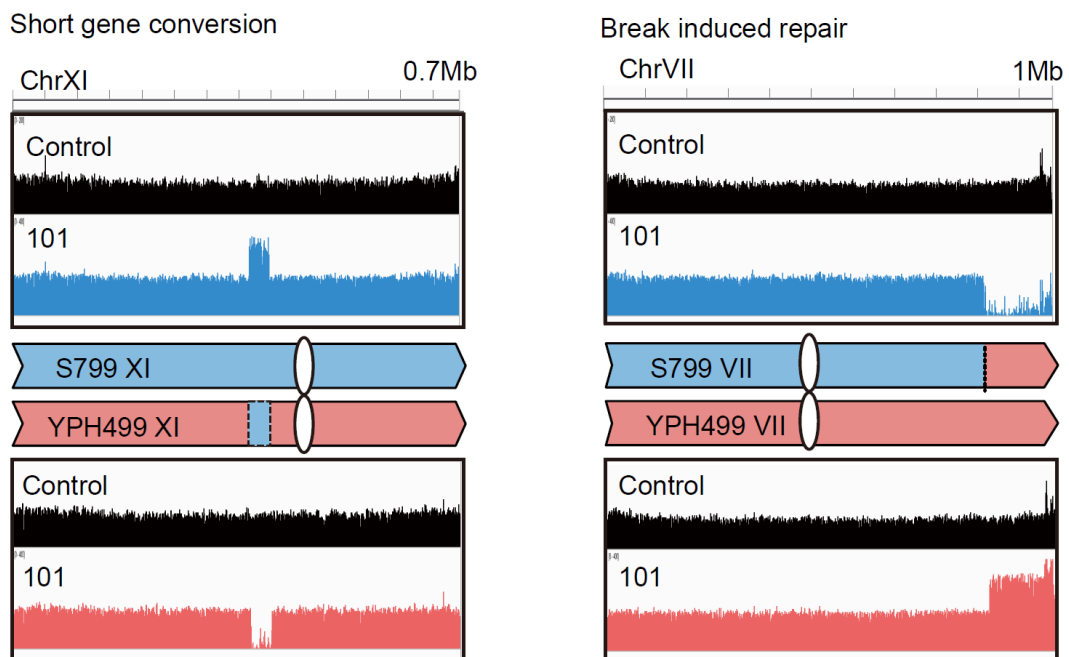

**Supplementary Fig. 3.** Chromosome structures in TAQed yeast strains. Chromosome-wide mapping data for control (black) and TAQed strains (S799, blue; YPH499, red) exhibiting typical chromosomal rearrangements: SGCs and BIRs.

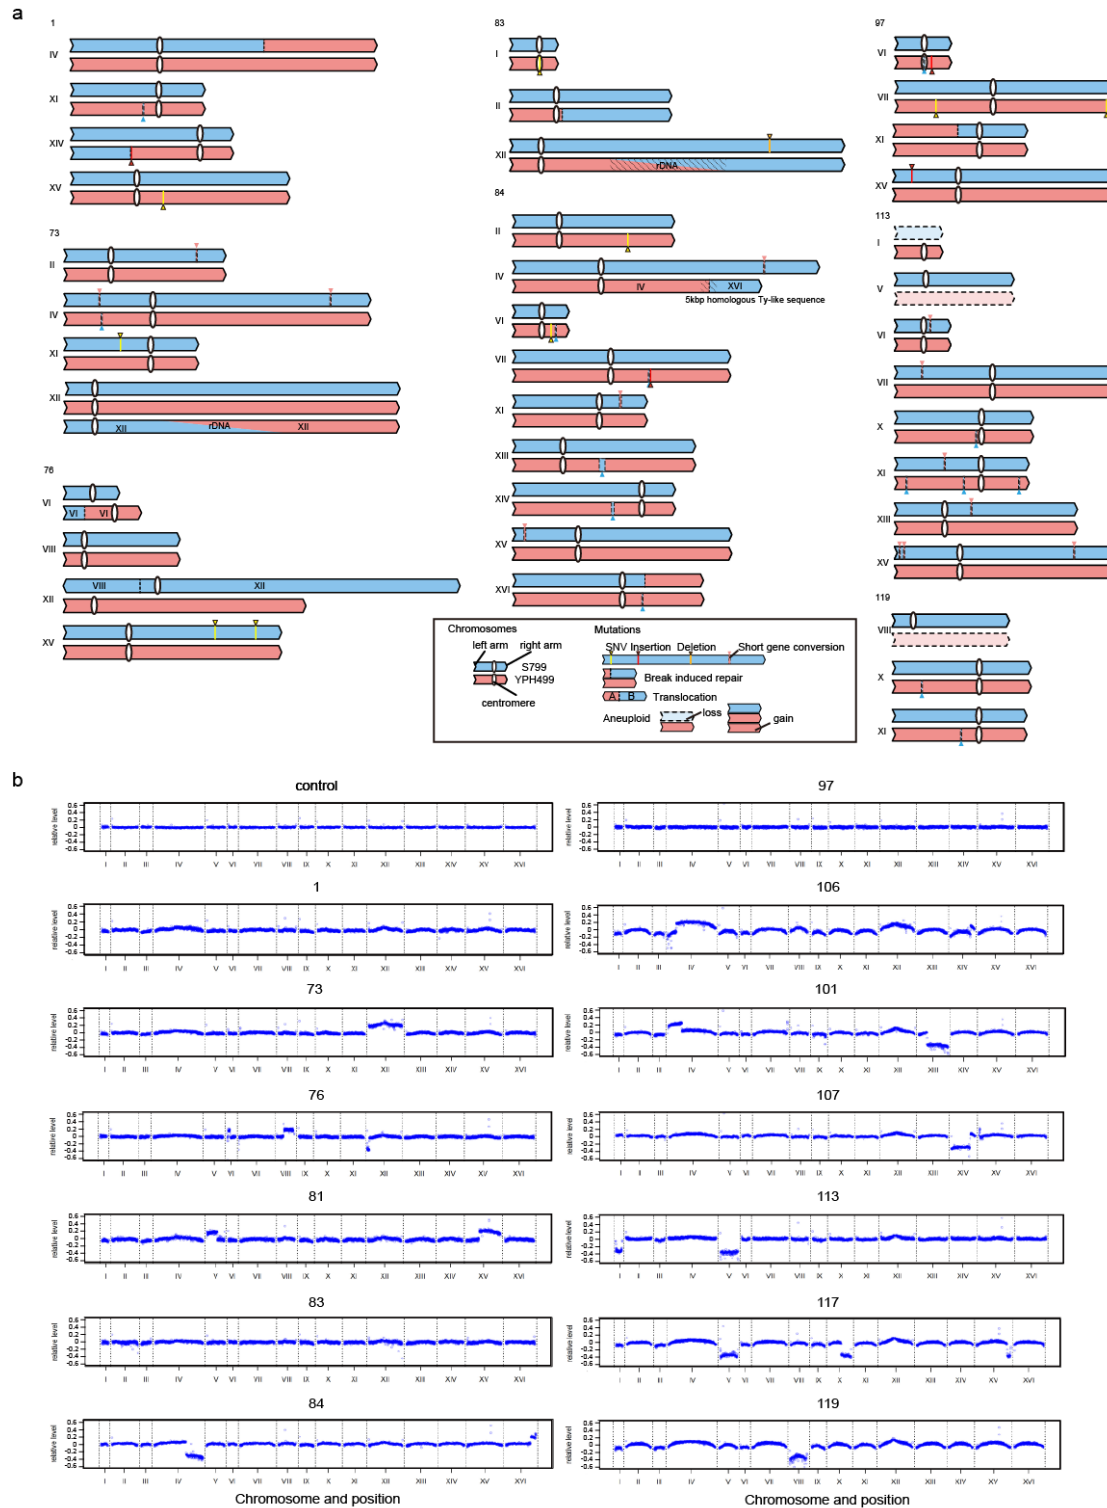

**Supplementary Fig. 4.** Genomic rearrangement of TAQed yeast strains. **(a)** Schematic diagrams of mutated chromosomes in TAQed strains 1, 73, 76, 83, 84, 97, 113, and 119. Only chromosomes with mutations or aneuploidies are shown. **(b)** aCGH analysis of the TAQed yeast strains used in this study. Genomic DNA from each strain was compared to controls (WT14: cell-fusion strain without TAQing treatment), and  $\log_{10}$  DNA copy number ratios were plotted. Data were cropped at a  $\log_{10}$  ratio of  $\sim 0.6$  and averaged across each chromosome using a sliding window of 10 oligonucleotides.

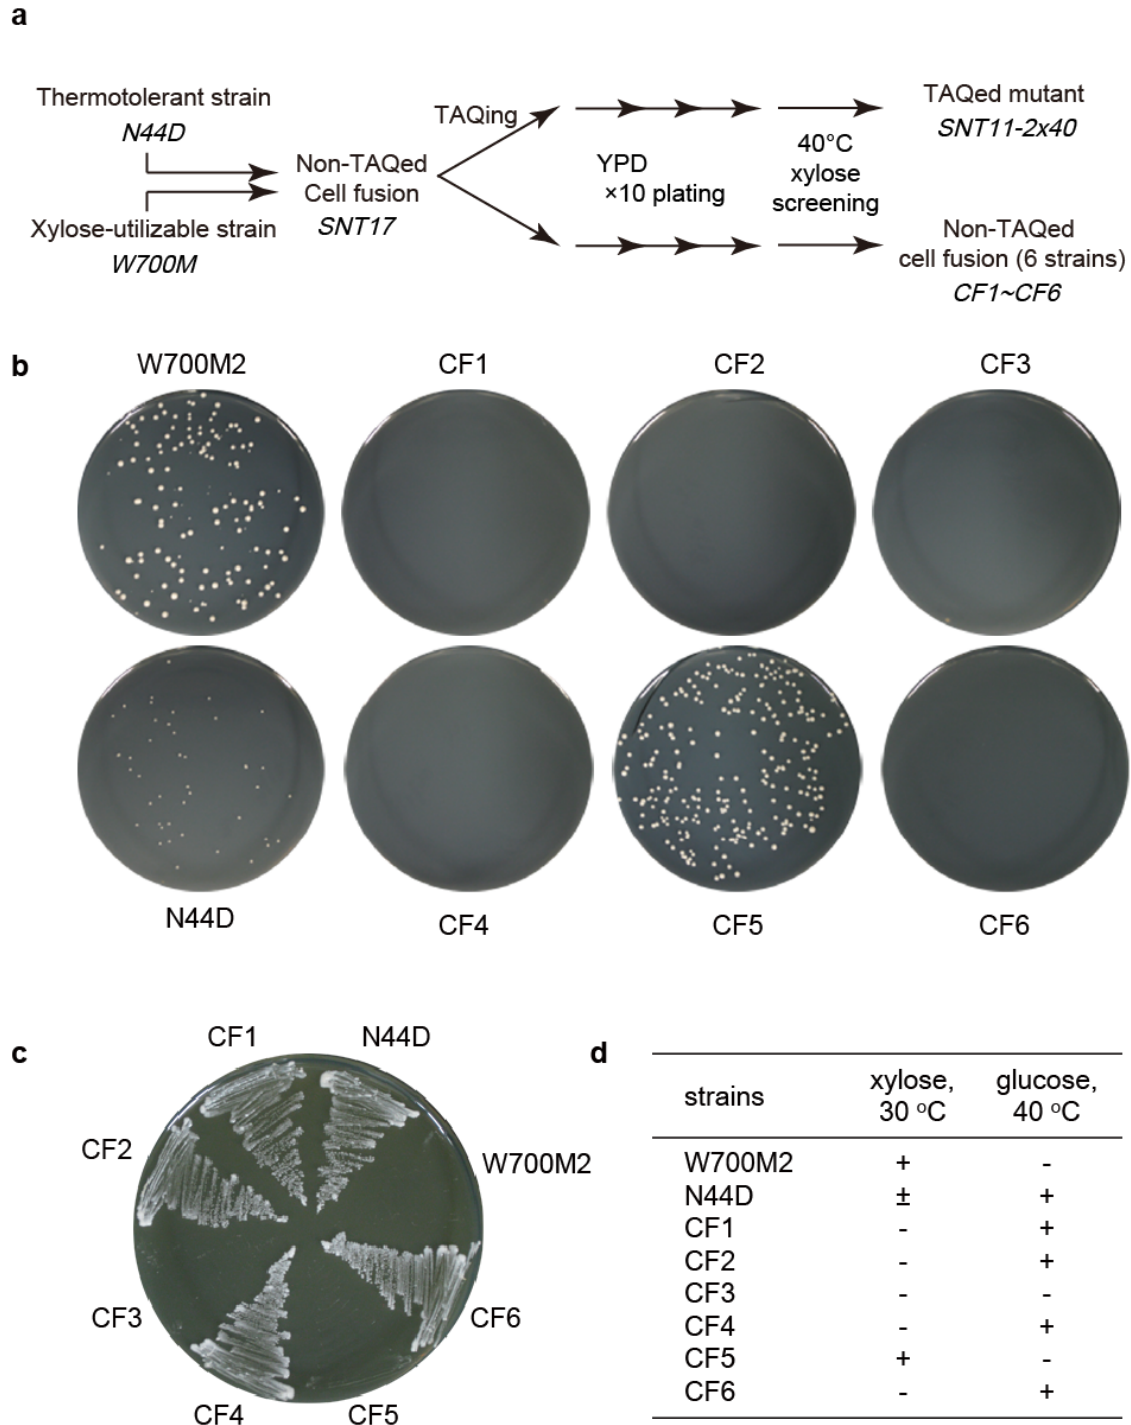

**Supplementary Fig. 5.** Growth phenotype of cell-fusion mutants. **(a)** Schematic image of xylose-utilizable, thermotolerant TAQed-mutant selection. **(b, c)** Photos show growth phenotype on **(b)** xylose agar plates at 30°C and **(c)** YPD agar plates at 40°C for 48 h. Xylose-fermentable strain (*W700M2*), heat-resistant parental strain (*N44D*), and non-TAQed cell-fusion strains (*CF1–6*). **(d)** Summary of growth on agar plates in the presence of xylose or glucose at 30°C or 40°C after 10 rounds of plating. Growth phenotypes: extensive (+), moderate (±), and weak (-).

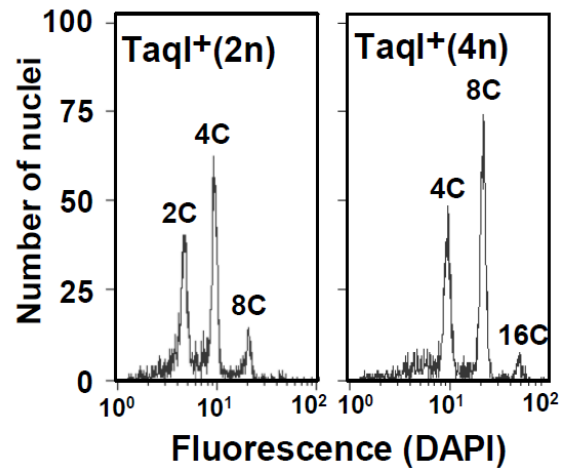

**Supplementary Fig. 6.** Colchicine-induced tetraploidization was examined in true leaf cells derived from 3-week-old TaqI<sup>+</sup>(2n) and TaqI<sup>+</sup>(4n) plants by flow cytometry. Each peak indicates a nuclear phase (2C, 4C, 8C, and 16C).

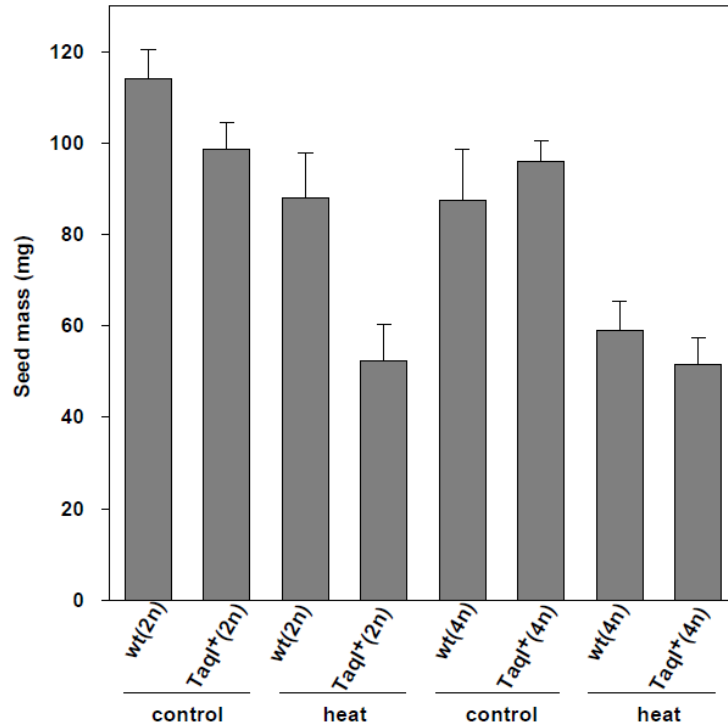

**Supplementary Fig. 7.** Seed mass of TaqI<sup>+</sup>(2n) and TaqI<sup>+</sup>(4n) plants. Data show the yields of seeds from plants grown in soil for 14 weeks along with heat treatment (heated at 37°C for 24 h in 1-week-old plants) or without heat treatment (control). Data represent the mean ± SEM ( $n = 7-10$ /strain).



a

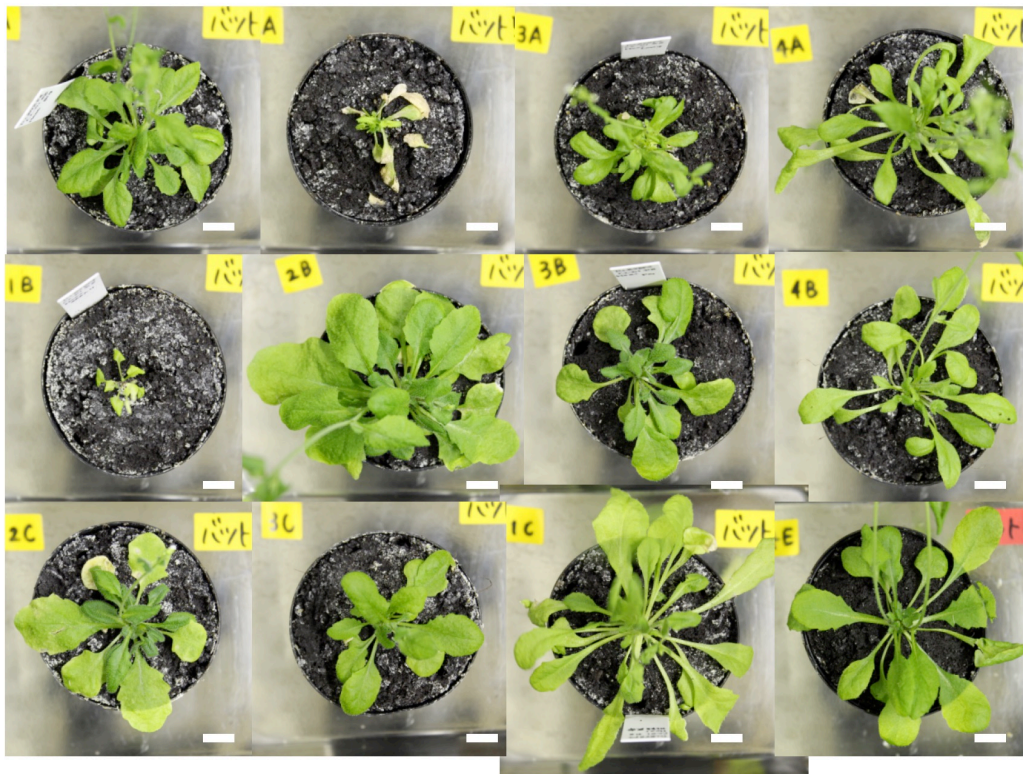

b

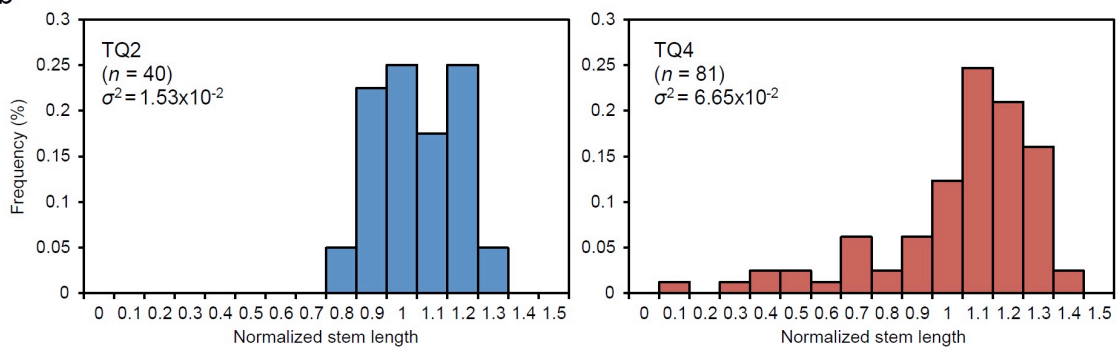

**Supplementary Fig. 8.** Phenotypic divergence of TQ4 plants. **(a)** Representative TQ4 plant morphology. The upper left image shows wt(4n) plants, and the others show TQ4 mutant plants grown in soil for 49 days. Bars, 1 cm. **(b)** Divergence of stem length in TQ2 and TQ4 plants grown in soil for ~9 weeks. The stem length was measured and normalized to an average of 1.0.  $\sigma^2$  represents the variance in the normalized stem length. The variance in the TQ4 plants was significantly larger than that in the TQ2 plants  $P < 0.01$ ;  $F$ -test).

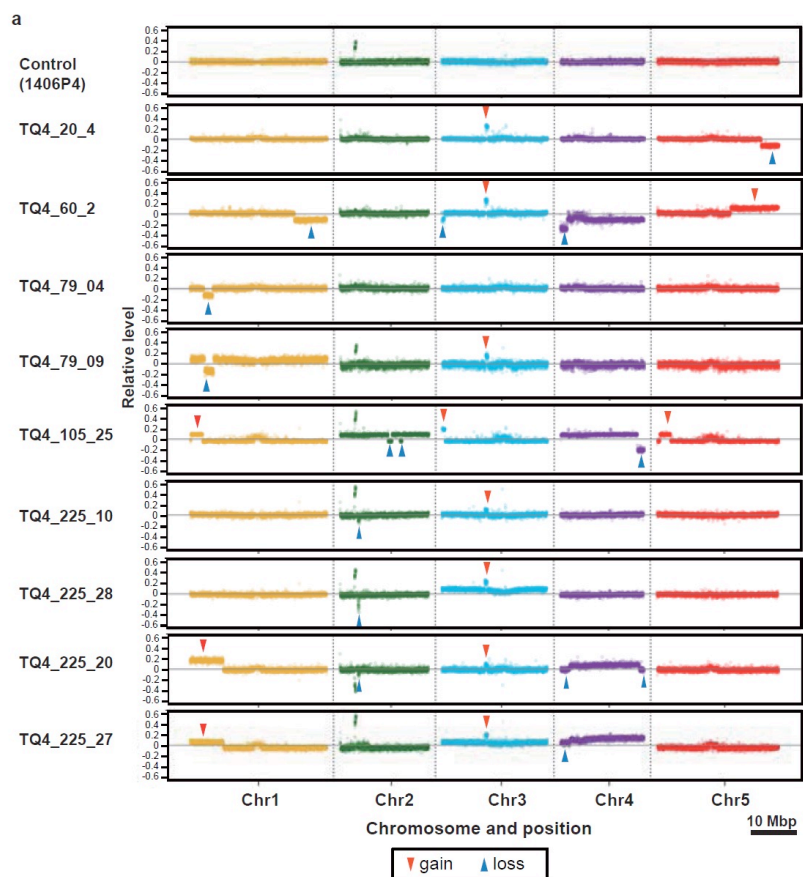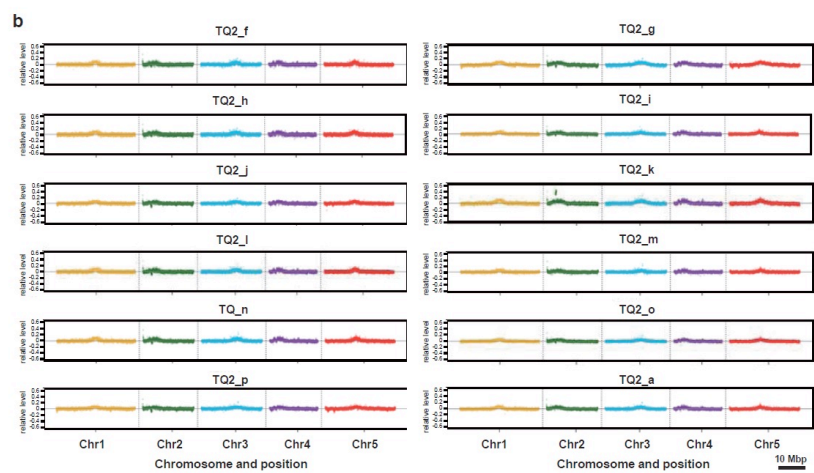

**Supplementary Fig. 9.** aCGH analysis of (a) TQ4 and (b) TQ2 plants. Genomic DNA from each strain was compared with that of controls [wt(2n) and wt(4n) for TQ2 and TQ4, respectively], and  $\log_{10}$  DNA copy number ratios were plotted. To interpret regions of large CNVs, data were cropped at a  $\log_{10}$  ratio of  $\pm 0.6$  and averaged across each chromosome using a sliding window of 10 oligonucleotides. Red arrowheads: increase in CNVs; blue arrowheads: decrease in CNVs.

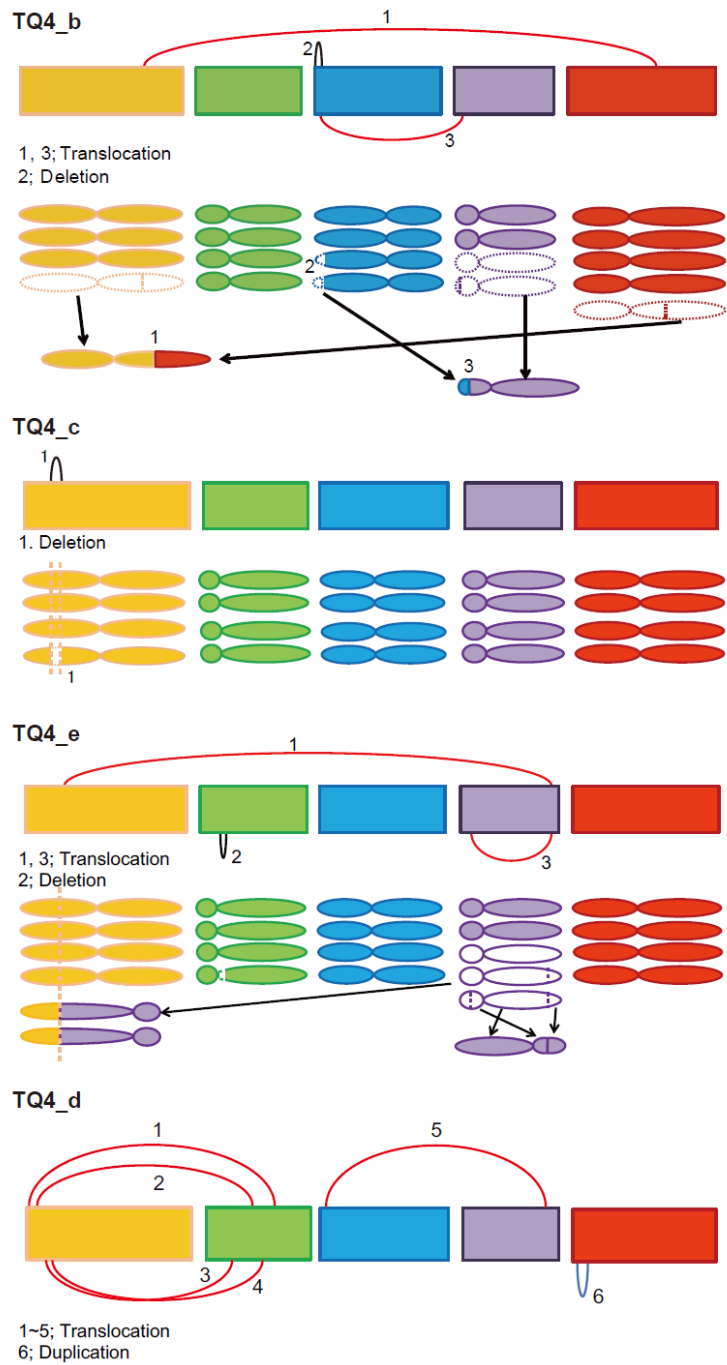

**Supplementary Fig. 10.** Estimated chromosome structure in each TQ4 plant based on genome-rearrangement analysis.

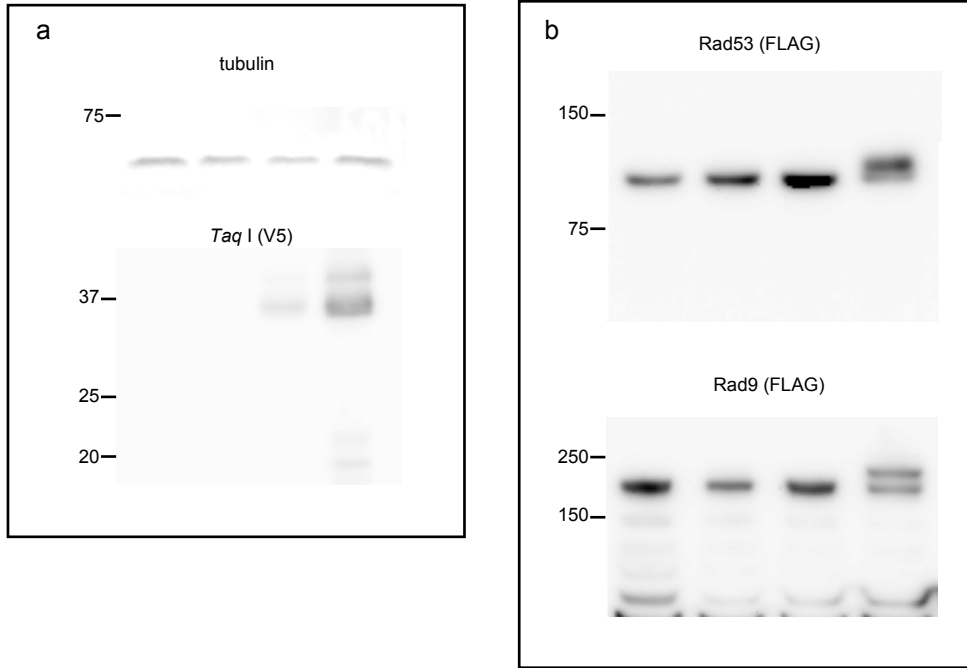

**Supplementary Fig. 11.** Uncropped blots. **(a)** Uncropped blots from Fig. 1b. **(b)** Uncropped blots from Fig. 1c.

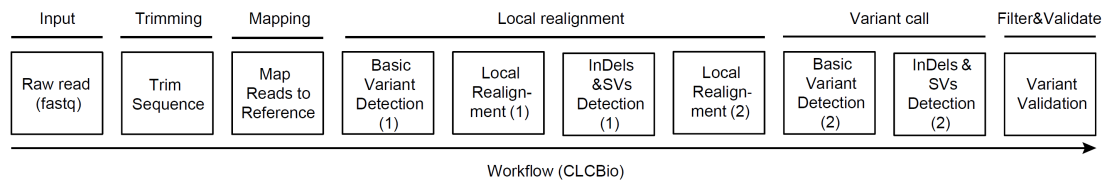

**Supplementary Fig. 12.** Workflow of variant detection in the *Arabidopsis* genome. Sequenced reads of TAQed plant genomes were mapped using commercial software (CLC Genomics Workbench v8.5; Qiagen).

### Haploid Genome Reference

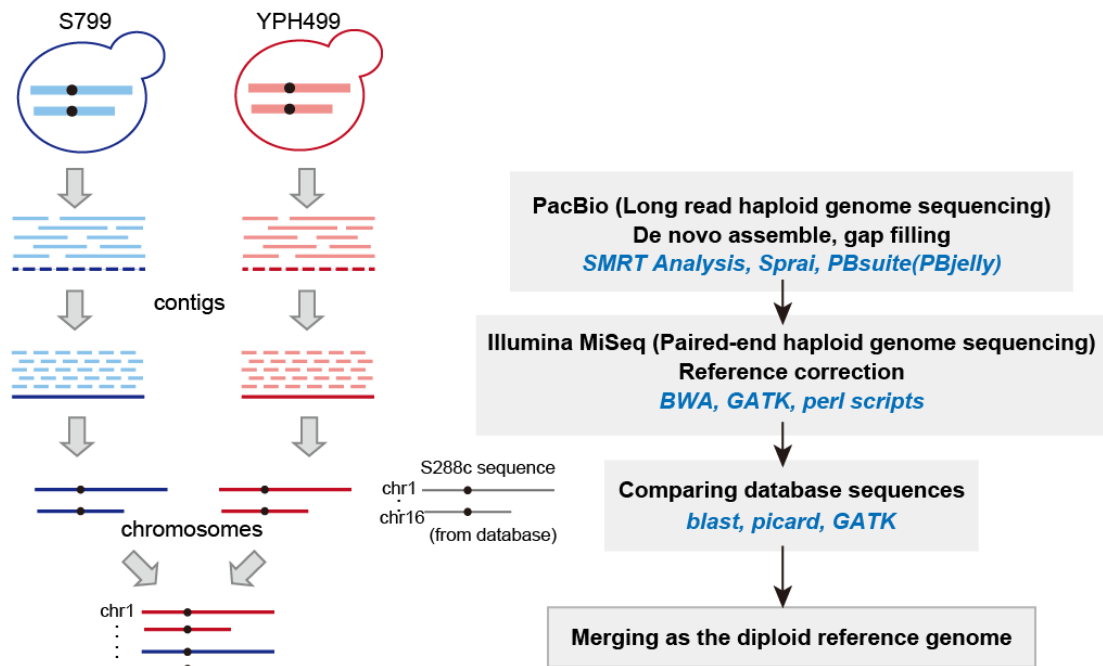

**Supplementary Fig. 13.** Bioinformatics workflow of yeast parental haploid-genome sequencing. *De novo* assembly was performed using PacBio data and corrected using MiSeq data.

|  |        |         | Number of |        |
|--|--------|---------|-----------|--------|
|  |        |         | SNP       | InDel  |
|  | S288c  | ) 0.05% | 5,088     | 810    |
|  | YPH499 |         | ) 0.72%   | 79,006 |
|  | S799   |         |           |        |

**Supplementary Fig. 14.** Numbers of SNPs and InDels between parental haploid strains. Genomic differences between S288c and YPH499, and YPH499 and S799 are shown.

(a)

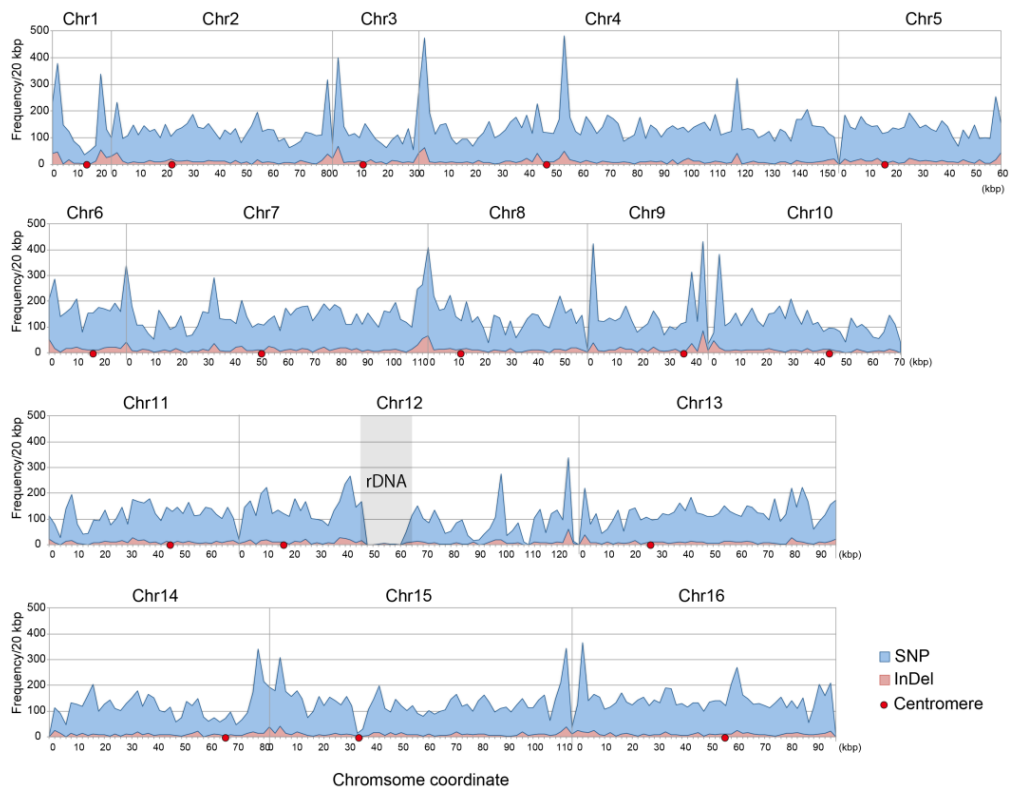

(b)

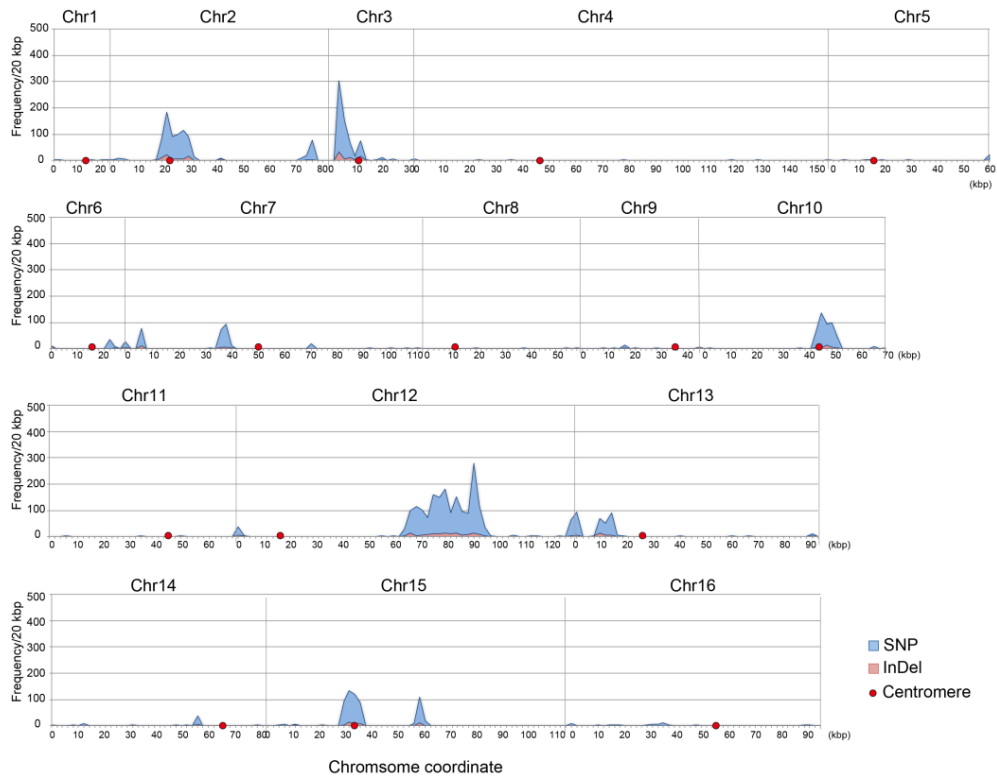

**Supplementary Fig. 15.** Distribution of SNPs and InDels between strains. SNP and InDel density among the 16 chromosomes between (a) S799 and YPH499 (average: 6.5 SNPs/kb and 0.7 InDels/kb) and b) YPH499 and S288c (average: 0.4 SNPs/kb and 0.07 InDels/kb).



## TAQing Mutation Detection

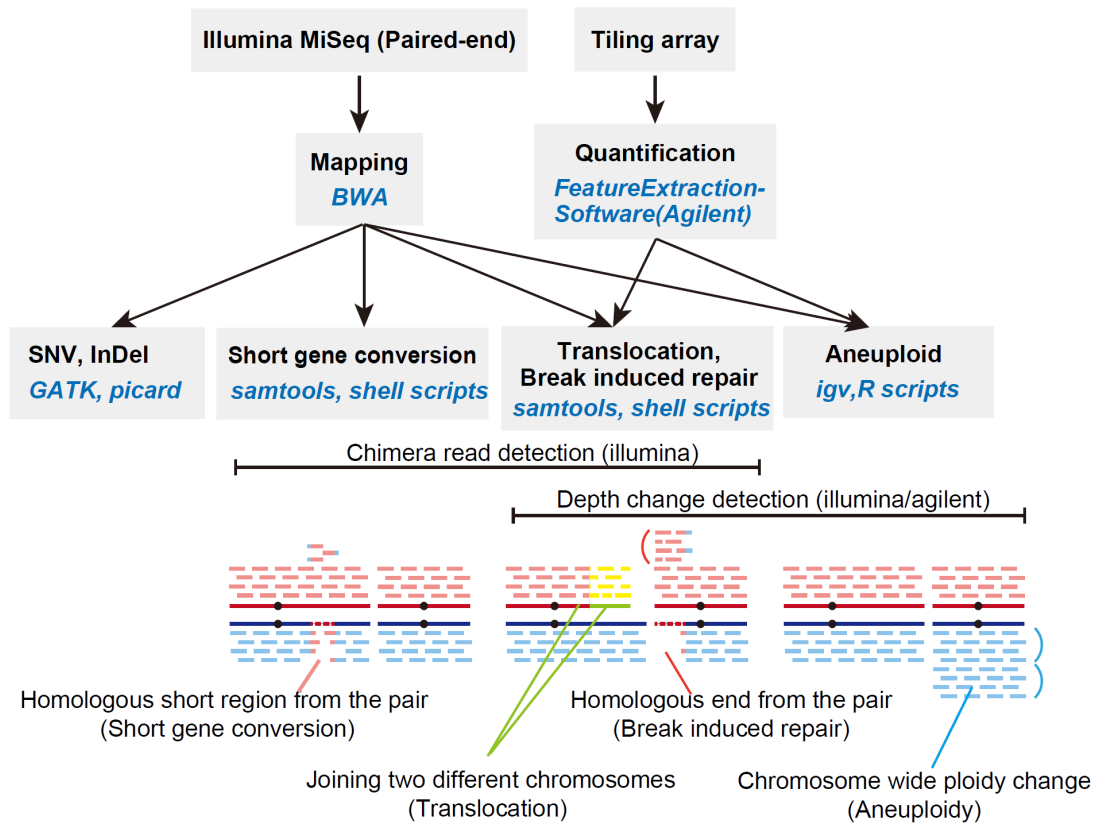

**Supplementary Fig. 16.** Bioinformatics workflow describing mutation detection in TAQed yeast. Genomic rearrangements were classified according to sequence features and copy number information.

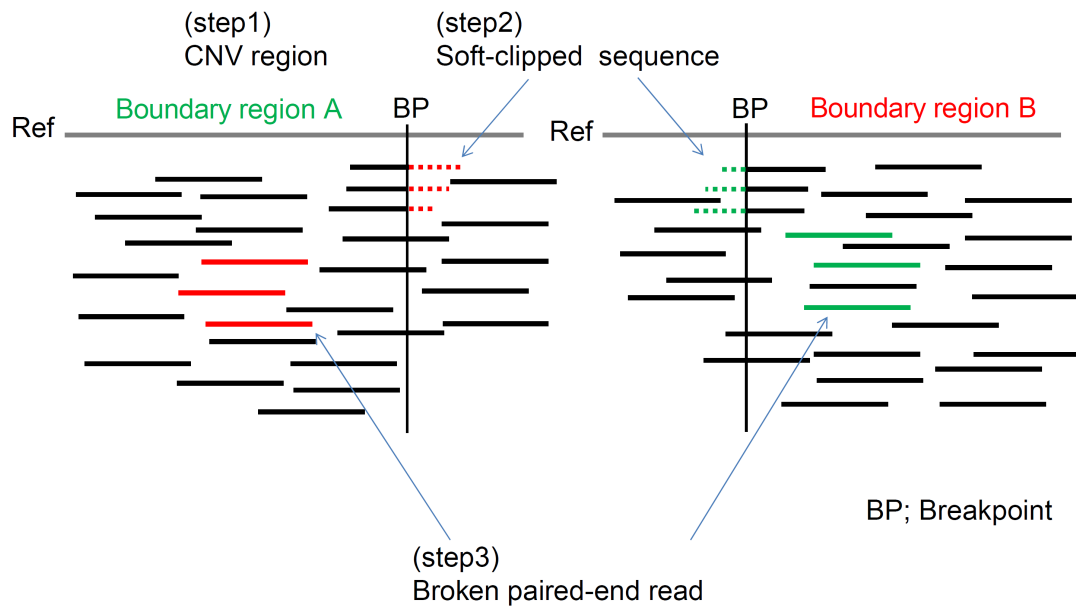

**Supplementary Fig. 17.** Validation of structural variants. To verify structural variants, we adopted a strategy involving three-step breakpoint confirmation, detection of CNV region using variant-call tools, and collection of soft-clipped sequence information, and detection of broken paired-end reads. Structural variants also detected in the control strains were excluded because of their potential as false positives.

**Supplementary Table 1-1.** Structural variants of yeast strains.

| strain | rearrangement type      | chromosome  |
|--------|-------------------------|-------------|
| 81     | Chromosomal duplication | YPH499Chr05 |
| 113    | Chromosomal deletion    | S799Chr01   |
| 113    | Chromosomal deletion    | YPH499Chr05 |
| 117    | Chromosomal deletion    | S799Chr05   |
| 119    | Chromosomal deletion    | YPH499Chr08 |

  

| strain | rearrangement type | chromosome  | position | mutation |
|--------|--------------------|-------------|----------|----------|
| 1      | insertion          | YPH499Chr14 | 307525   | G->GA    |
| 1      | SNP                | YPH499Chr15 | 470253   | A->G     |
| 73     | SNP                | S799Chr11   | 286372   | G->C     |
| 76     | SNP                | S799Chr15   | 773938   | A->G     |
| 76     | SNP                | S799Chr15   | 979734   | G->A     |
| 81     | SNP                | YPH499Chr11 | 109779   | C->T     |
| 83     | SNP                | YPH499Chr01 | 153350   | G->C     |
| 84     | SNP                | YPH499Chr02 | 584251   | G->A     |
| 84     | SNP                | YPH499Chr06 | 195908   | C->T     |
| 84     | insertion          | YPH499Chr07 | 698814   | C->CA    |
| 97     | SNP                | YPH499Chr07 | 211054   | C->G     |
| 97     | SNP                | YPH499Chr07 | 1083671  | C->A     |
| 97     | insertion          | S799Chr15   | 96926    | T->TATA  |
| 97     | insertion          | YPH499Chr06 | 187330   | G->GATA  |
| 101    | SNP                | S799Chr08   | 159700   | A->G     |
| 101    | SNP                | S799Chr09   | 391001   | G->A     |
| 101    | SNP                | YPH499Chr05 | 495128   | G->A     |
| 101    | SNP                | YPH499Chr05 | 495149   | C->T     |
| 101    | insertion          | S799Chr10   | 336446   | G->GA    |
| 101    | insertion          | S799Chr12   | 636809   | C->CA    |
| 107    | SNP                | YPH499Chr04 | 138021   | C->A     |
| 107    | SNP                | YPH499Chr04 | 138034   | A->C     |
| 117    | SNP                | S799Chr13   | 208484   | G->T     |

  

| strain | rearrangement type | chromosome  | start   | end     |
|--------|--------------------|-------------|---------|---------|
| 1      | SGC                | YPH499Chr11 | 352300  | 358300  |
| 73     | SGC                | S799Chr02   | 673200  | 681200  |
| 73     | SGC                | S799Chr04   | 180000  | 188500  |
| 73     | SGC                | S799Chr04   | 1320800 | 1323800 |
| 73     | SGC                | YPH499Chr04 | 180600  | 181600  |
| 83     | deletion           | S799Chr12   | 857796  | 857822  |
| 84     | SGC                | S799Chr04   | 1207300 | 1215000 |
| 84     | SGC                | YPH499Chr06 | 204000  | 209500  |
| 84     | SGC                | YPH499Chr07 | 694300  | 698600  |
| 84     | SGC                | S799Chr11   | 563400  | 577100  |
| 84     | SGC                | YPH499Chr13 | 454000  | 480000  |
| 84     | SGC                | YPH499Chr14 | 501600  | 516700  |
| 84     | SGC                | S799Chr15   | 58800   | 73400   |
| 84     | SGC                | YPH499Chr16 | 693000  | 697000  |
| 97     | SGC                | YPH499Chr06 | 154200  | 156400  |
| 101    | SGC                | YPH499Chr02 | 324500  | 327800  |
| 101    | SGC                | S799Chr05   | 485600  | 488700  |

Blue data represent the approximate rearrangement regions, whereas black data represent precise positions. (SNP; Single Nucleotide Polymorphisms, SGC; Short Gene Conversion, BIR; Break induced repair, TL; translocation)

**Supplementary Table 1-2.** Structural variants of yeast strains.

| strain | rearrangement type | chromosome  | start  | end    |
|--------|--------------------|-------------|--------|--------|
| 101    | SGC                | S799Chr09   | 379600 | 390600 |
| 101    | SGC                | YPH499Chr11 | 355400 | 385400 |
| 101    | SGC                | YPH499Chr14 | 316400 | 320000 |
| 106    | SGC                | S799Chr15   | 366300 | 369900 |
| 106    | SGC                | S799Chr15   | 775000 | 780000 |
| 107    | SGC                | S799Chr02   | 490400 | 496800 |
| 107    | SGC                | YPH499Chr04 | 134300 | 137700 |
| 107    | SGC                | S799Chr15   | 959600 | 972700 |
| 107    | SGC                | YPH499Chr14 | 596600 | 620900 |
| 107    | SGC                | YPH499Chr16 | 162500 | 175200 |
| 107    | SGC                | YPH499Chr16 | 885300 | 888600 |
| 113    | SGC                | S799Chr06   | 212000 | 219500 |
| 113    | SGC                | YPH499Chr11 | 46900  | 54500  |
| 113    | SGC                | YPH499Chr11 | 347000 | 348000 |
| 113    | SGC                | YPH499Chr11 | 633000 | 635200 |
| 113    | SGC                | S799Chr11   | 277600 | 278400 |
| 113    | SGC                | S799Chr07   | 159300 | 160000 |
| 113    | SGC                | YPH499Chr10 | 419800 | 421700 |
| 113    | SGC                | S799Chr13   | 373800 | 378000 |
| 113    | SGC                | S799Chr15   | 19800  | 22000  |
| 113    | SGC                | S799Chr15   | 44300  | 46300  |
| 113    | SGC                | S799Chr15   | 909000 | 912600 |
| 119    | SGC                | YPH499Chr11 | 330800 | 333900 |
| 119    | SGC                | YPH499Chr10 | 167000 | 168000 |

  

| strain | rearrangement type | Left arm    | Right arm   | rearranged position |
|--------|--------------------|-------------|-------------|---------------------|
| 1      | BIR                | S799Chr04   | YPH499Chr04 | 987500              |
| 1      | BIR                | S799Chr14   | YPH499Chr14 | 280500              |
| 83     | BIR                | YPH499Chr02 | S799Chr02   | 264600              |
| 83     | BIR                | YPH499Chr12 | S799Chr12   | rDNA                |
| 84     | BIR                | S799Chr16   | YPH499Chr16 | 700100              |
| 97     | BIR                | YPH499Chr11 | S799Chr11   | 316500              |
| 101    | BIR                | S799Chr07   | YPH499Chr07 | 929500              |
| 101    | BIR                | YPH499Chr09 | S799Chr09   | 385400              |
| 106    | BIR                | S799Chr12   | YPH499Chr12 | rDNA                |
| 106    | BIR                | YPH499Chr14 | S799Chr14   | 649000              |
| 106    | BIR                | YPH499Chr14 | S799Chr14   | 649000              |
| 107    | BIR                | S799Chr15   | YPH499Chr15 | 114500              |

  

| strain | rearrangement type | chromosome  | region  | chromosome  | region |
|--------|--------------------|-------------|---------|-------------|--------|
| 73     | TL (homologous)    | S799Chr12   | rDNA    | YPH499Chr12 | rDNA   |
| 76     | TL (nonhomologous) | S799Chr06   | 134761  | YPH499Chr06 | 33331  |
| 76     | TL (nonhomologous) | S799Chr12   | 78284   | S799Chr08   | 210916 |
| 81     | TL (nonhomologous) | S799Chr05   | 361265  | YPH499Chr15 | 420401 |
| 84     | TL (homologous)    | YPH499Chr04 | 1000000 | S799Chr16   | 773500 |
| 101    | TL (nonhomologous) | YPH499Chr04 | 445948  | YPH499Chr13 | 260552 |
| 106    | TL (nonhomologous) | YPH499Chr14 | 674104  | YPH499Chr04 | 295155 |
| 107    | TL (nonhomologous) | YPH499Chr15 | 47643   | S799Chr14   | 622638 |
| 117    | TL (homologous)    | S799Chr10   | 410800  | S799Chr15   | 945200 |

Blue data represent the approximate rearrangement regions, whereas black data represent precise positions. (SNP; Single Nucleotide Polymorphisms, SGC; Short Gene Conversion, BIR; Break induced repair, TL; translocation)

**Supplementary Table 2.** Structural variants of TQ4 plants.

| sample | SV no.            | rearrangement type   | region        | TaqI | Transposons on breakpoint | Transposon super family |
|--------|-------------------|----------------------|---------------|------|---------------------------|-------------------------|
| TQ4_b  | SV1               | Inter-chromosomal    | Chr1:23227210 | 0    | ND                        |                         |
|        |                   |                      | Chr5:16328954 | 0    | AT5TE58950                | RC/Helitron             |
|        | SV2               | Deletion             | Chr3:38491    | 0    | ND                        |                         |
|        |                   |                      | Chr3:524640   | 0    | ND                        |                         |
| SV4    | Inter-chromosomal | Chr3:524640          | 0             | ND   |                           |                         |
|        |                   | Chr4:1476226         | 0             | ND   |                           |                         |
| TQ4_c  | SV1               | Deletion             | Chr1:3047208  | 0    | ND                        |                         |
|        |                   |                      | Chr1:5077993  | 0    | ND                        |                         |
| TQ4_e  | SV1               | Inter-chromosomal    | Chr1:7401166  | 0    | ND                        |                         |
|        |                   |                      | Chr4:17530659 | 0    | ND                        |                         |
|        | SV2               | Deletion             | Chr2:4022542  | 169  | AT2TE17040                | RC/Helitron             |
|        |                   |                      | Chr2:4291943  | 32   | AT2TE18015                | LTR/Gypsy               |
|        | SV4               | Intra-chromosomal    | Chr4:2020501  | 0    | ND                        |                         |
|        |                   |                      | Chr4:17530659 | 0    | ND                        |                         |
| TQ4_d  | SV1               | Inter-chromosomal    | Chr1:101475   | 315  | ND                        |                         |
|        |                   |                      | Chr2:13702700 | 18   | ND                        |                         |
|        | SV2               | Inter-chromosomal    | Chr1:101880   | 720  | ND                        |                         |
|        |                   |                      | Chr2:11519791 | 33   | ND                        |                         |
|        | SV3               | Inter-chromosomal    | Chr1:105950   | 2    | ND                        |                         |
|        |                   |                      | Chr2:10649312 | 10   | AT2TE45655                | DNA/HAT                 |
|        | SV4               | Inter-chromosomal    | Chr1:2667845  | 573  | ND                        |                         |
|        |                   |                      | Chr2:13319792 | 37   | ND                        |                         |
|        | SV5               | Inter-chromosomal    | Chr3:627333   | 0    | ND                        |                         |
|        |                   |                      | Chr4:17055078 | 0    | ND                        |                         |
|        | SV7               | Duplication (tandem) | Chr5:508246   | 0    | ND                        |                         |
|        |                   |                      | Chr5:2845500  | 0    | ND                        |                         |

SV: structural variant; ND: not detected.

**Supplementary Data 1. Variant and strain lists of TQ2 and TQ4 plants.**

->Excel file

**Supplementary Data 2. Strain lists of yeasts and plants used in this study.**

->Excel file

**Supplementary Data 3. Statistics associated with yeast haploid-genome assembly and mapping information.**

->Excel file
