# Supplementary material for: Phenotypic diversification by enhanced genome restructuring after induction of multiple DNA double-strand breaks
Source: PubMed Central journal article supplement (PMC5959919; doi:10.1038/s41467-018-04256-y), 2018-05-18
Supplement: 41467_2018_4256_MOESM3_ESM.pdf [file 41467_2018_4256_MOESM3_ESM.pdf]

## **Description of Additional Supplementary Files**

File Name: Supplementary Data 1

Description: Variant and strain lists of TQ2 and TQ4 plants.

File Name: Supplementary Data 2

Description: Strain lists of yeasts and plants used in this study.

File Name: Supplementary Data 3

Description: Statistics associated with yeast haploid-genome assembly and mapping information.
